# Supplementary material
Source: ML conference proceedings conference paper supplement (https://proceedings.mlr.press/v54/kwon17a.html)
Supplement: Supplementary file 1 [file kwon17a-supp.pdf]

## A Proofs of technical results

### A.1 Proof of Proposition 3.1

**Lemma A.1** *There exists a finite family of polytopes  $(\mathcal{X}^\ell)_{\ell \in \mathcal{L}}$  such that*

$$(i) \quad \Delta(\mathcal{I}) = \bigcup_{\ell \in \mathcal{L}} \mathcal{X}^\ell;$$

(ii) *For each  $\ell \in \mathcal{L}$  and  $f \in \mathcal{F}$ ,  $\mathbf{r}(\cdot, f)$  is affine on  $\mathcal{X}^\ell$ .*

**Proof.** Let  $1 \leq n \leq d$  and  $b \in \mathcal{B}$ . Let us first prove that  $\mathbf{r}^n(\cdot, b)$  is piecewise affine. The map  $\mathbf{f}$  being affine and defined on  $\Delta(\mathcal{J})$ , the set  $\mathbf{f}^{-1}(b)$  is a polytope. Denote  $y_{b,1}, \dots, y_{b,q}$  its vertices. Let  $x \in \Delta(\mathcal{I})$ . By linearity of  $\mathbf{g}(x, \cdot)$ ,  $\mathbf{r}^n(x, b)$  can then be written

$$\mathbf{r}^n(x, b) = \max \mathbf{g}^n(x, \mathbf{f}^{-1}(b)) = \max_{1 \leq p \leq q} \mathbf{g}^n(x, y_{b,p}).$$

$\mathbf{r}^n(\cdot, b)$  now appears as the maximum of a finite family  $(\mathbf{g}^n(\cdot, y_{b,p}))_{1 \leq p \leq q}$  of linear functions. It is therefore piecewise affine and so is  $\mathbf{r}(\cdot, b)$ . Therefore, for each  $b \in \mathcal{B}$  there exists a decomposition of  $\Delta(\mathcal{I})$  into polytopes on each of which  $\mathbf{r}(\cdot, b)$  is affine.  $\mathcal{B}$  being finite, we can consider the decomposition  $(\mathcal{X}^\ell)_{\ell \in \mathcal{L}}$  which refines all of them.  $\mathbf{r}(\cdot, b)$  is therefore affine on each polytope  $\mathcal{X}^\ell$  for all  $b \in \mathcal{B}$ . Let us now prove that  $\mathbf{r}(\cdot, f)$  is affine on each polytope  $\mathcal{X}^\ell$  for all  $f \in \mathcal{F}$ .

Let  $f \in \mathcal{F}$ ,  $\ell \in \mathcal{L}$ ,  $x_1, x_2 \in \mathcal{X}^\ell$  and  $\lambda \in [0, 1]$ . We consider the unique decomposition  $f = \sum_{b \in \mathcal{B}} \mu^b \cdot b$  and  $k \in \mathcal{K}$  such that  $\text{supp } \mu \subset \mathcal{F}^k$ . Using the definition of  $\mathbf{r}$  and the affinity of  $\mathbf{r}(\cdot, b)$  on  $\mathcal{X}^\ell$ , we have

$$\begin{aligned} & \mathbf{r}(\lambda x_1 + (1 - \lambda)x_2, f) \\ &= \sum_{b \in \mathcal{B}} \mu^b \cdot \mathbf{r}(\lambda x_1 + (1 - \lambda)x_2, b) \\ &= \sum_{b \in \mathcal{B}} \mu^b (\lambda \mathbf{r}(x_1, b) + (1 - \lambda)\mathbf{r}(x_2, b)) \\ &= \lambda \sum_{b \in \mathcal{B}} \mu^b \cdot \mathbf{r}(x_1, b) + (1 - \lambda) \sum_{b \in \mathcal{B}} \mu^b \cdot \mathbf{r}(x_2, b) \\ &= \lambda \mathbf{r}(x_1, f) + (1 - \lambda)\mathbf{r}(x_2, f), \end{aligned}$$

where the last equality stands because of the uniqueness of the decomposition of  $f$  lets us recognize the definitions of  $\mathbf{r}(x_1, b)$  and  $\mathbf{r}(x_2, b)$  from Equation (4).  $\square$

**Proof. of Proposition 3.1** (i) Let  $x \in \Delta(\mathcal{I})$  and  $y \in \Delta(\mathcal{J})$ . Denote  $f = \mathbf{f}(y)$ . We consider the unique decomposition  $f = \sum_{b \in \mathcal{B}} \mu^b \cdot b$  and  $k \in \mathcal{K}$  such that

$\text{supp } \mu \subset \mathcal{F}^k$ .  $\mathbf{f}^{-1}$  being affine on  $\mathcal{F}^k$ , we have

$$\begin{aligned} \mathbf{g}(x, y) &\in \mathbf{g}(x, \mathbf{f}^{-1}(f)) \\ &= \mathbf{g}\left(x, \mathbf{f}^{-1}\left(\sum_{b \in \text{supp } \mu} \mu^b \cdot b\right)\right) \\ &= \mathbf{g}\left(x, \sum_{b \in \mathcal{B}} \mu^b \cdot \mathbf{f}^{-1}(b)\right) \\ &= \sum_{b \in \text{supp } \mu} \mu^b \cdot \mathbf{g}(x, \mathbf{f}^{-1}(b)). \end{aligned}$$

Then for each  $1 \leq n \leq d$ ,

$$\begin{aligned} \mathbf{g}^n(x, y) &\leq \max_{b \in \text{supp } \mu} \sum \mu^b \cdot \mathbf{g}^n(x, \mathbf{f}^{-1}(b)) \\ &= \sum_{b \in \mathcal{B}} \mu^b \cdot \max \mathbf{g}^n(x, \mathbf{f}^{-1}(b)) \\ &= \sum_{b \in \mathcal{B}} \mu^b \cdot \mathbf{r}^n(x, b) = \mathbf{r}^n(x, f), \end{aligned}$$

where for the second equality, we recognized the definition of  $\mathbf{r}^n(x, b)$  from Equation (3) on page 5, and the the last equality, the definition of  $\mathbf{r}^n(x, f)$  from Equation (4).

(ii) Let  $f \in \mathcal{F}$ . Thanks to the characterization of approachability from Proposition 1, there exists  $x \in \Delta(\mathcal{I})$  such that  $\mathbf{m}(x, f) \in \mathbb{R}_-^d$ . Let  $f = \sum_{b \in \mathcal{B}} \mu^b \cdot b$  be the unique decomposition of  $f$  given by Lemma 3.1. With the same arguments as above, we have for each  $1 \leq n \leq d$ ,

$$\begin{aligned} \mathbf{r}^n(x, f) &= \sum_{b \in \mathcal{B}} \mu^b \cdot \mathbf{r}^n(x, b) \\ &= \sum_{b \in \mathcal{B}} \mu^b \cdot \max \mathbf{g}^n(x, \mathbf{f}^{-1}(b)) \\ &= \max \sum_{b \in \mathcal{B}} \mu^b \cdot \mathbf{g}^n(x, \mathbf{f}^{-1}(b)) \\ &= \max \mathbf{g}^n\left(x, \mathbf{f}^{-1}\left(\sum_{b \in \mathcal{B}} \mu^b \cdot b\right)\right) \\ &= \max \mathbf{g}^n(x, \mathbf{f}^{-1}(f)) = \max \mathbf{m}^n(x, f) \leq 0. \end{aligned}$$

Therefore,  $\mathbf{r}(x, f) \in \mathbb{R}_-^d$ .

(iii) Let  $x \in \Delta(\mathcal{I})$ ,  $k \in \mathcal{K}$ ,  $f_1, f_2 \in \mathcal{F}^k$  and  $\lambda \in [0, 1]$ . We write  $f_1 = \sum_{b \in \mathcal{B}} \mu_1^b \cdot b$  and  $f_2 = \sum_{b \in \mathcal{B}} \mu_2^b \cdot b$  with  $\text{supp } \mu_1 \subset \mathcal{F}^k$  and  $\text{supp } \mu_2 \subset \mathcal{F}^k$ . The unique decomposition of  $\lambda f_1 + (1 - \lambda)f_2$  given by Lemma 3.1 is then

$$\lambda f_1 + (1 - \lambda)f_2 = \sum_{b \in \mathcal{B}} (\lambda \mu_1^b + (1 - \lambda)\mu_2^b) \cdot b.$$

Therefore, using the definition of  $\mathbf{r}$  and the affinity of  $\mathbf{r}(x, \cdot)$  on  $\mathcal{F}^k$ ,

$$\begin{aligned} & \mathbf{r}(x, \lambda f_1 + (1 - \lambda)f_2) \\ &= \mathbf{r}\left(x, \sum_{b \in \mathcal{B}} (\lambda \mu_1^b + (1 - \lambda)\mu_2^b) \cdot b\right) \\ &= \sum_{b \in \mathcal{B}} (\lambda \mu_1^b + (1 - \lambda)\mu_2^b) \cdot \mathbf{r}(x, b) \\ &= \lambda \sum_{b \in \mathcal{B}} \mu_1^b \cdot \mathbf{r}(x, b) \\ &\quad + (1 - \lambda) \sum_{b \in \mathcal{B}} \mu_2^b \cdot \mathbf{r}(x, b) \\ &= \lambda \mathbf{r}(x, f_1) + (1 - \lambda) \cdot \mathbf{r}(x, f_2). \end{aligned}$$

(iv) is already proved in Lemma A.1.  $\square$

## A.2 Existence of $\mathbf{r}^{[k]}$

**Proposition A.2** *For every  $k \in \mathcal{K}$ , there exists a map  $\mathbf{r}^{[k]} : \Delta(\mathcal{I}) \times \mathbb{R}^{\mathcal{S} \times \mathcal{I}} \rightarrow \mathbb{R}^d$  such that*

(i) *for all  $x \in \Delta(\mathcal{I})$ , the map  $\mathbf{r}^{[k]}(x, \cdot) : \mathbb{R}^{\mathcal{S} \times \mathcal{I}} \rightarrow \mathbb{R}^d$  is linear;*

(ii) *for all  $x \in \Delta(\mathcal{I})$  and  $f \in \mathcal{F}^k$ ,  $\mathbf{r}^{[k]}(x, f) = \mathbf{r}(x, f)$ .*

**Proof.** Let  $k \in \mathcal{K}$  and  $x \in \Delta(\mathcal{I})$ . Let us consider  $\text{span}(\mathcal{F}^k) \subset \mathbb{R}^{\mathcal{S} \times \mathcal{I}}$ , the linear span of  $\mathcal{F}^k$ . There exists a basis  $(f_1, \dots, f_q)$  of  $\text{span}(\mathcal{F}^k)$  such that  $f_p$  belongs to  $\mathcal{F}^k$  for each  $1 \leq p \leq q$ . We now define  $\mathbf{r}^{[k]}(x, \cdot)$  on  $\text{span}(\mathcal{F}^k)$  by setting

$\mathbf{r}^{[k]}(x, f_p) := \mathbf{r}(x, f_p)$ , for each element  $f_p$  of the basis,

and extending linearly.  $\mathbf{r}^{[k]}(x, \cdot)$  can then be further extended to the whole space  $\mathbb{R}^{\mathcal{S} \times \mathcal{I}}$  by setting its value to zero on some complementary subspace of  $\text{span}(\mathcal{F}^k)$ .

Let us now prove that  $\mathbf{r}^{[k]}(x, \cdot)$  coincides with  $\mathbf{r}(x, \cdot)$  on  $\mathcal{F}^k$ . Let  $f \in \mathcal{F}^k$ . In particular,  $f$  belongs to  $\text{span}(\mathcal{F}^k)$  and can be uniquely written

$$f = \sum_{p=1}^q \lambda_p f_p, \quad \text{where } \lambda_1, \dots, \lambda_q \in \mathbb{R}.$$

The application  $\mathbf{r}^{[k]}(x, \cdot)$  being linear by definition, we have

$$\mathbf{r}^{[k]}(x, f) = \sum_{p=1}^q \lambda_p \mathbf{r}(x, f_p).$$

We now aim at proving that the above sum is equal to  $\mathbf{r}(x, f)$ . This cannot be done by directly applying the affinity of  $\mathbf{r}(x, \cdot)$  (property (iii) in Lemma 3.1) because

some of the above coefficients  $\lambda_p$  may be negative. To overcome this, we first separate the terms according to the signs of the coefficients  $\lambda_p$ . We denote  $\Lambda^+$  (resp.  $\Lambda^-$ ) the sum of all positive (resp. negative) coefficients  $\lambda_p$  and write

$$\begin{aligned} \mathbf{r}^{[k]}(x, f) &= \sum_{\lambda_p > 0} \lambda_p \mathbf{r}(x, f_p) + \sum_{\lambda_p < 0} \lambda_p \mathbf{r}(x, f_p) \\ &= \Lambda^+ \sum_{\lambda_p > 0} \left( \frac{\lambda_p}{\Lambda^+} \right) \mathbf{r}(x, f_p) \\ &\quad + \Lambda^- \sum_{\lambda_p < 0} \left( \frac{\lambda_p}{\Lambda^-} \right) \mathbf{r}(x, f_p). \end{aligned}$$

Since each of the above sum is now a convex combination, we can apply the affinity of  $\mathbf{r}(x, \cdot)$ :

$$\begin{aligned} \mathbf{r}^{[k]}(x, f) &= \Lambda^+ \cdot \mathbf{r}\left(x, \sum_{\lambda_p > 0} \left( \frac{\lambda_p}{\Lambda^+} \right) f_p\right) \\ &\quad + \Lambda^- \cdot \mathbf{r}\left(x, \sum_{\lambda_p < 0} \left( \frac{\lambda_p}{\Lambda^-} \right) f_p\right). \end{aligned}$$

Let us prove that

$$\begin{aligned} & \mathbf{r}(x, f) - \Lambda^- \cdot \mathbf{r}\left(x, \sum_{\lambda_p < 0} \left( \frac{\lambda_p}{\Lambda^-} \right) f_p\right) \\ &= \Lambda^+ \cdot \mathbf{r}\left(x, \sum_{\lambda_p > 0} \left( \frac{\lambda_p}{\Lambda^+} \right) f_p\right). \end{aligned} \quad (5)$$

This will prove that  $\mathbf{r}^{[k]}(x, f) = \mathbf{r}(x, f)$ .

$$\begin{aligned} & \mathbf{r}(x, f) - \Lambda^- \cdot \mathbf{r}\left(x, \sum_{\lambda_p < 0} \left( \frac{\lambda_p}{\Lambda^-} \right) f_p\right) \\ &= (1 - \Lambda^-) \left( \frac{1}{1 - \Lambda^-} \mathbf{r}(x, f) \right. \\ &\quad \left. + \frac{-\Lambda^-}{1 - \Lambda^-} \mathbf{r}\left(x, \sum_{\lambda_p < 0} \left( \frac{\lambda_p}{\Lambda^-} \right) f_p\right) \right) \\ &= (1 - \Lambda^-) \cdot \mathbf{r}\left(x, \frac{1}{1 - \Lambda^-} f + \sum_{\lambda_p < 0} \left( -\frac{\lambda_p}{1 - \Lambda^-} \right) f_p\right) \\ &= (1 - \Lambda^-) \cdot \mathbf{r}\left(x, \frac{1}{1 - \Lambda^-} \left( f - \sum_{\lambda_p < 0} \lambda_p f_p \right) \right) \\ &= (1 - \Lambda^-) \cdot \mathbf{r}\left(x, \sum_{\lambda_p > 0} \left( \frac{\lambda_p}{1 - \Lambda^-} \right) f_p\right). \end{aligned}$$

For relation (5) to be true, it is now enough to prove that  $\Lambda^+ + \Lambda^- = 1$ . Since  $\mathcal{F}^k \subset \mathcal{F} \subset \Delta(\mathcal{S})^{\mathcal{I}}$ , for any  $f_0 = (f_0^{is})_{\substack{s \in \mathcal{S} \\ i \in \mathcal{I}}} \in \mathcal{F}^k$ , we have

$$\sum_{\substack{s \in \mathcal{S} \\ i \in \mathcal{I}}} f_0^{is} = \sum_{i \in \mathcal{I}} \sum_{s \in \mathcal{S}} f_0^{is} = \sum_{i \in \mathcal{I}} 1 = |\mathcal{I}|.$$

By applying the above to  $f$  and the  $f_p$ , we get

$$\begin{aligned} |\mathcal{I}| &= \sum_{\substack{s \in \mathcal{S} \\ i \in \mathcal{I}}} f^{is} = \sum_{\substack{s \in \mathcal{S} \\ i \in \mathcal{I}}} \left( \sum_{\lambda_p > 0} \lambda_p f_p^{is} + \sum_{\lambda_p < 0} \lambda_p f_p^{is} \right) \\ &= \sum_{\lambda_p > 0} \lambda_p \sum_{\substack{s \in \mathcal{S} \\ i \in \mathcal{I}}} f_p^{is} + \sum_{\lambda_p < 0} \lambda_p \sum_{\substack{s \in \mathcal{S} \\ i \in \mathcal{I}}} f_p^{is} \\ &= \Lambda^+ |\mathcal{I}| + \Lambda^- |\mathcal{I}|, \end{aligned}$$

and we indeed get  $\Lambda^+ + \Lambda^- = 1$  by dividing by  $|\mathcal{I}|$ , which concludes the proof.  $\square$

### A.3 A lemma on $L_{\mathbf{r}}$

Recall that  $L_{\mathbf{r}}$  was defined as the maximal Lipschitz constant of mappings  $\mathbf{r}(x, \cdot)$ . Then it is also the maximal operator norm of the linear maps  $\mathbf{r}^{[k]}(a, \cdot)$ :

$$L_{\mathbf{r}} := \max_{\substack{k \in \mathcal{K} \\ a \in \mathcal{A}}} \max_{\substack{f \in \mathbb{R}^{\mathcal{S} \times \mathcal{I}} \\ f \neq 0}} \frac{\|\mathbf{r}^{[k]}(a, f)\|_2}{\|f\|_2}.$$

**Lemma A.3**  $L_{\mathbf{r}}$  is a common Lipschitz constant to  $\mathbf{r}(a, \cdot)$  and  $\mathbf{r}^{[k]}(a, \cdot)$  ( $k \in \mathcal{K}$  and  $a \in \mathcal{A}$ ). In other words, for all  $k \in \mathcal{K}$  and  $a \in \mathcal{A}$ , we have

$$(i) \text{ for all } f, f' \in \mathbb{R}^{\mathcal{S} \times \mathcal{I}}, \|\mathbf{r}^{[k]}(a, f) - \mathbf{r}^{[k]}(a, f')\|_2 \leq L_{\mathbf{r}} \|f - f'\|_2;$$

$$(ii) \text{ for all } f, f' \in \mathcal{F}, \|\mathbf{r}(a, f) - \mathbf{r}(a, f')\|_2 \leq L_{\mathbf{r}} \|f - f'\|_2.$$

**Proof.** Property (i) follows from the definition of  $L_{\mathbf{r}}$  and the linearity of the map  $\mathbf{r}^{[k]}(a, \cdot)$ .

(ii) Let  $k \in \mathcal{K}$ ,  $a \in \mathcal{A}$  and  $f, f' \in \mathcal{F}$ .  $(\mathcal{F}^k)_{k \in \mathcal{K}}$  being a finite decomposition of  $\mathcal{F}$  into convex polytopes, there exists a finite sequence  $(k_1, k_2, \dots, k_q)$  in  $\mathcal{K}$  such that the  $k_p$ 's are all different and a sequence  $(f_0 = f, f_1, f_2, \dots, f_q = f')$  in the affine segment  $[f, f']$  such that  $[f_{p-1}, f_p] \subset \mathcal{F}^{k_p}$  for each  $1 \leq p \leq q$ , see Figure 1. Therefore, using the fact that  $\mathbf{r}^{[k]}(a, \cdot)$  and

Figure 1: An illustrative figure of the sequence  $(f_0 = f, f_1, f_2, \dots, f_q = f')$

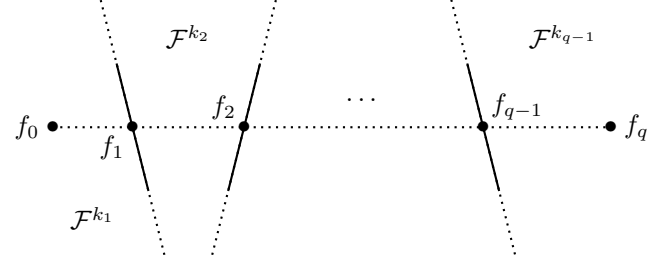

$\mathbf{r}(a, \cdot)$  coincide on  $\mathcal{F}^{k'}$  for all  $k' \in \mathcal{K}$ , we can write

$$\begin{aligned} &\|\mathbf{r}(a, f) - \mathbf{r}(a, f')\|_2 \\ &= \left\| \sum_{p=1}^q (\mathbf{r}(a, f_{p-1}) - \mathbf{r}(a, f_p)) \right\|_2 \\ &= \left\| \sum_{p=1}^q \mathbf{r}^{[k_p]}(a, f_{p-1}) - \mathbf{r}^{[k_p]}(a, f_p) \right\|_2 \\ &\leq \sum_{p=1}^q \left\| \mathbf{r}^{[k_p]}(a, f_{p-1}) - \mathbf{r}^{[k_p]}(a, f_p) \right\|_2 \\ &\leq L_{\mathbf{r}} \sum_{p=1}^q \|f_{p-1} - f_p\|_2 \\ &= L_{\mathbf{r}} \|f - f'\|_2, \end{aligned}$$

where the last equality holds because the points  $f_0, \dots, f_q$  are aligned and ordered.  $\square$

### A.4 Proof of Proposition 3.2

**Proof.** Using the definition of  $\mathbf{R}$ ,

$$\begin{aligned} &\mathbf{R} \left( (\mathbf{1}_{\{k_0=k\}} \lambda^a \cdot f)_{\substack{k \in \mathcal{K} \\ a \in \mathcal{A}}} \right) \\ &= \sum_{k \in \mathcal{K}} \sum_{a \in \mathcal{A}} \mathbf{r}^{[k]}(a, \mathbf{1}_{\{k_0=k\}} \lambda^a \cdot f) \\ &= \sum_{a \in \mathcal{A}} \lambda^a \cdot \mathbf{r}^{[k_0]}(a, f) \\ &= \sum_{a \in \mathcal{A}} \lambda^a \cdot \mathbf{r}(a, f) = \mathbf{r}(x, f), \end{aligned}$$

where the second equality holds because by linearity of  $\mathbf{r}^{[k]}(a, \cdot)$  (Proposition A.2), the fourth because  $\mathbf{r}^{[k_0]}(x, \cdot)$  and  $\mathbf{r}(x, \cdot)$  coincide on  $\mathcal{F}^{k_0}$  (property (ii) in Proposition A.2), and the last by affinity of  $\mathbf{r}(\cdot, f)$  on  $\mathcal{X}^\ell$  (property (iv) in Proposition 3.1).  $\square$

### A.5 Proof of Proposition 3.3

(i) Let  $k \in \mathcal{K}$ .  $\mathbf{R}_k^{-1}(\mathbb{R}_-^d)$  is a closed convex cone as the inverse image via a linear application of the closed convex cone  $\mathbb{R}_-^d$  (Proposition C.5).  $\mathcal{F}_c^k$  is a closed convex cone by definition, and  $(\mathcal{F}_c^k)^\mathcal{A}$  is thus a closed convex cone as a Cartesian product of closed convex cones. Therefore,  $\tilde{\mathcal{C}}^k = \mathbf{R}_k^{-1}(\mathbb{R}_-^d) \cap (\mathcal{F}_c^k)^\mathcal{A}$  is also a closed convex cone as the intersection of two closed convex cones. Then,  $\tilde{\mathcal{C}}$  is also a closed convex cone as a Cartesian product of closed convex cones.

(ii) Let  $\tilde{g} = (\tilde{g}^{ka})_{a \in \mathcal{A}} \in \tilde{\mathcal{C}}$ . By definition of  $\tilde{\mathcal{C}}$ , for each  $k \in \mathcal{K}$ ,  $(\tilde{g}^{ka})_{a \in \mathcal{A}}$  belongs to  $\tilde{\mathcal{C}}^k$  and thus to  $(\mathcal{F}_c^k)^\mathcal{A}$ . Therefore,  $\tilde{g} \in \prod_{k \in \mathcal{K}} (\mathcal{F}_c^k)^\mathcal{A}$ . Moreover,

$$\mathbf{R}(\tilde{g}) = \sum_{k \in \mathcal{K}} \mathbf{R}_k((\tilde{g}^{ka})_{a \in \mathcal{A}})$$

belongs to  $\mathbb{R}_-^d$ . Indeed, each term of the above sum belongs to  $\mathbb{R}_-^d$  because for all  $k \in \mathcal{K}$ ,  $(\tilde{g}^{ka})_{a \in \mathcal{A}} \in \tilde{\mathcal{C}}^k \subset \mathbf{R}_k^{-1}(\mathbb{R}_-^d)$ .

(iii) This full information game has convex compact decision sets and a bilinear payoff function. Thanks to the characterization of approachable closed convex cones in full information, the statement of the proposition is then equivalent to Blackwell condition:

$$\forall f \in \mathcal{F}, \exists \tilde{x} \in \Delta(\mathcal{K} \times \mathcal{A}), \quad \tilde{\mathbf{g}}(\tilde{x}, f) \in \tilde{\mathcal{C}},$$

which we now aim at proving. Let  $f \in \mathcal{F}$  and  $k_0 \in \mathcal{K}$  such that  $f \in \mathcal{F}^{k_0}$ . According to property (ii) in Proposition 3.1, there exists  $x \in \Delta(\mathcal{I})$  such that such that  $\mathbf{r}(x, f) \in \mathbb{R}_-^d$ . By Proposition 3.1, there exists  $\ell \in \mathcal{L}$  such that  $x \in \mathcal{X}^\ell$  and we can write  $x$  as a convex combination of the vertices of  $\mathcal{X}^\ell$ :

$$x = \sum_{a \in \mathcal{A}} \lambda^a \cdot a \quad \text{where} \quad \begin{cases} (\lambda^a)_{a \in \mathcal{A}} \in \Delta(\mathcal{A}) \\ \text{supp}(\lambda^a)_{a \in \mathcal{A}} \subset \mathcal{X}^\ell. \end{cases}$$

Now consider the random decision

$$\tilde{x} := (\mathbf{1}_{\{k=k_0\}} \lambda^a)_{\substack{k \in \mathcal{K} \\ a \in \mathcal{A}}} \in \Delta(\mathcal{K} \times \mathcal{A})$$

and let us prove that  $\tilde{\mathbf{g}}(\tilde{x}, f) \in \tilde{\mathcal{C}}$ . We have by definition of  $\tilde{\mathbf{g}}$ :

$$\tilde{\mathbf{g}}(\tilde{x}, f) = (\mathbf{1}_{\{k=k_0\}} \lambda^a \cdot f)_{\substack{k \in \mathcal{K} \\ a \in \mathcal{A}}},$$

and since  $\tilde{\mathcal{C}} = \prod_{k \in \mathcal{K}} \tilde{\mathcal{C}}^k$ , we only have to check that  $(\lambda^a f)_{a \in \mathcal{A}}$  belongs to  $\tilde{\mathcal{C}}^{k_0} = \mathbf{R}_{k_0}^{-1}(\mathbb{R}_-^d) \cap (\mathcal{F}_c^{k_0})^\mathcal{A}$ . First, because  $f \in \mathcal{F}^{k_0}$ ,  $\lambda^a f$  belongs to the closed convex cone  $\mathcal{F}_c^{k_0} = \mathbb{R}_+ \mathcal{F}^{k_0}$  and we have indeed  $(\lambda^a f)_{a \in \mathcal{A}} \in (\mathcal{F}_c^{k_0})^\mathcal{A}$ . Then, let us prove that  $\mathbf{R}_{k_0}((\lambda^a f)_{a \in \mathcal{A}}) \in \mathbb{R}_-^d$ .

Using Proposition 3.2,

$$\begin{aligned} \mathbf{R}_{k_0}((\lambda^a f)_{a \in \mathcal{A}}) &= \mathbf{R} \left( (\mathbf{1}_{\{k=k_0\}} \lambda^a \cdot f)_{\substack{k \in \mathcal{K} \\ a \in \mathcal{A}}} \right) \\ &= \mathbf{r}(x, f) \in \mathbb{R}_-^d. \end{aligned}$$

Therefore, we have proved that  $(\lambda^a f)_{a \in \mathcal{A}}$  belongs to  $\tilde{\mathcal{C}}^{k_0} = \mathbf{R}_{k_0}^{-1}(\mathbb{R}_-^d) \cap (\mathcal{F}_c^{k_0})^\mathcal{A}$ , and thus, that  $\tilde{\mathbf{g}}(\tilde{x}, f) \in \tilde{\mathcal{C}}$ , which concludes the proof.  $\square$

### A.6 Properties of the estimate $\hat{f}_t$ .

**Lemma A.4** For all  $t \geq 1$ ,

$$(i) \quad \mathbb{E}[\hat{f}_t \mid \mathcal{G}_t] = \mathbb{E}[f_t \mid \mathcal{G}_t];$$

$$(ii) \quad \mathbb{E} \left[ \left\| \hat{f}_t \right\|_2^2 \mid \mathcal{G}_t \right] \leq \frac{|\mathcal{I}|^2}{\gamma};$$

$$(iii) \quad \left\| \hat{f}_t \right\|_2^2 \leq \frac{|\mathcal{I}|^2}{\gamma^2}.$$

**Proof.** (i) Let  $i \in \mathcal{I}$ . Using the conditional expectation with respect to event  $\{i_t = i\}$ , we have

$$\begin{aligned} \mathbb{E}[\hat{f}_t^i \mid \mathcal{G}_t] &= \mathbb{E} \left[ \frac{\mathbf{1}_{\{i_t=i\}}}{\mathbb{P}[i_t=i \mid \mathcal{G}_t]} \delta_{s_t} \mid \mathcal{G}_t \right] \\ &= \mathbb{P}[i_t=i \mid \mathcal{G}_t] \mathbb{E} \left[ \frac{\delta_{s_t}}{\mathbb{P}[i_t=i \mid \mathcal{G}_t]} \mid \mathcal{G}_t, \{i_t=i\} \right] \\ &= \mathbb{E}[\delta_{s_t} \mid \mathcal{G}_t, \{i_t=i\}] \\ &= \mathbb{E}[\mathbb{E}[\delta_{s_t} \mid y_t, \mathcal{G}_t, \{i_t=i\}] \mid \mathcal{G}_t, \{i_t=i\}] \\ &= \mathbb{E}[\mathbf{s}(i, y_t) \mid \mathcal{G}_t, \{i_t=i\}] \\ &= \mathbb{E}[\mathbf{s}(i, y_t) \mid \mathcal{G}_t] \\ &= \mathbb{E}[f_t^i \mid \mathcal{G}_t], \end{aligned}$$

hence the result.

(ii) We write

$$\begin{aligned} \mathbb{E} \left[ \left\| \hat{f}_t \right\|_2^2 \mid \mathcal{G}_t \right] &= \mathbb{E} \left[ \sum_{i \in \mathcal{I}} \left\| \frac{\mathbf{1}_{\{i_t=i\}}}{\mathbb{P}[i_t=i \mid \mathcal{G}_t]} \delta_{s_t} \right\|_2^2 \mid \mathcal{G}_t \right] \\ &= \mathbb{P}[i_t=i \mid \mathcal{G}_t] \\ &\quad \times \mathbb{E} \left[ \sum_{i \in \mathcal{I}} \left\| \frac{\delta_{s_t}}{\mathbb{P}[i_t=i \mid \mathcal{G}_t]} \right\|_2^2 \mid \mathcal{G}_t, \{i_t=i\} \right] \\ &= \sum_{i \in \mathcal{I}} \frac{1}{\mathbb{P}[i_t=i \mid \mathcal{G}_t]} \mathbb{E} \left[ \left\| \delta_{s_t} \right\|_2^2 \mid \mathcal{G}_t, \{i_t=i\} \right] \\ &= \sum_{i \in \mathcal{I}} \frac{1}{\mathbb{P}[i_t=i \mid \mathcal{G}_t]} \\ &\leq \frac{|\mathcal{I}|^2}{\gamma}, \end{aligned}$$

where the last inequality stands because  $\mathbb{P}[i_t=i \mid \mathcal{G}_t] \geq \gamma/|\mathcal{I}|$  by definition of the algorithm.

(iii) We have

$$\begin{aligned} \|\hat{f}_t\|_2^2 &= \sum_{i \in \mathcal{I}} \left\| \frac{\mathbb{1}_{\{i_t=i\}}}{\mathbb{P}[i_t=i | \mathcal{G}_t]} \delta_{s_t} \right\|_2^2 \\ &= \sum_{i \in \mathcal{I}} \mathbb{1}_{\{i_t=i\}} \frac{\|\delta_{s_t}\|_2^2}{\mathbb{P}[i_t=i | \mathcal{G}_t]^2} \\ &\leq \frac{|\mathcal{I}|^2}{\gamma^2} \sum_{i \in \mathcal{I}} \mathbb{1}_{\{i_t=i\}} = \frac{|\mathcal{I}|^2}{\gamma^2}. \end{aligned}$$

respect to  $\mathcal{G}_t$ , we can make  $\mathbb{E}[\hat{f}_t | \mathcal{G}_t]$  appear as follows:

$$\begin{aligned} \mathbb{E}[\langle \tilde{g}_t | \tilde{z}_t \rangle] &= \mathbb{E} \left[ \mathbb{E} \left[ \langle \tilde{\mathbf{g}}((k_t, a_t), \hat{f}_t) | \tilde{z}_t \rangle \middle| \mathcal{G}_t \right] \right] \\ &= \mathbb{E} \left[ \langle \tilde{\mathbf{g}}((k_t, a_t), \mathbb{E}[\hat{f}_t | \mathcal{G}_t]) | \tilde{z}_t \rangle \right] \\ &= \mathbb{E}[\langle \tilde{\mathbf{g}}((k_t, a_t), \mathbb{E}[f_t | \mathcal{G}_t]) | \tilde{z}_t \rangle] \\ &= \mathbb{E}[\langle \tilde{\mathbf{g}}((k_t, a_t), f_t) | \tilde{z}_t \rangle], \end{aligned}$$

where we used Lemma A.4 to replace the conditional expectation of  $\hat{f}_t$  by the conditional expectation of  $f_t$ . Now consider the sigma-algebra  $\mathcal{H}_t$  generated by

$$(k_1, a_1, i_1, s_1, \dots, k_{t-1}, a_{t-1}, i_{t-1}, s_{t-1}).$$

By definition of the algorithm, the law of random variable  $(k_t, a_t)$  knowing  $\mathcal{H}_t$  is  $\tilde{x}_t$ . We now resume the above computation by introducing the conditional expectation with respect to  $\mathcal{H}_t$  and  $f_t$ :

$$\begin{aligned} \mathbb{E}[\langle \tilde{g}_t | \tilde{z}_t \rangle] &= \mathbb{E}[\langle \tilde{\mathbf{g}}((k_t, a_t), f_t) | \tilde{z}_t \rangle] \\ &= \mathbb{E}[\mathbb{E}[\langle \tilde{\mathbf{g}}((k_t, a_t), f_t) | \tilde{z}_t \rangle | \mathcal{H}_t, f_t]] \\ &= \mathbb{E}[\langle \tilde{\mathbf{g}}(\mathbb{E}[(k_t, a_t) | \mathcal{H}_t, f_t], f_t) | \tilde{z}_t \rangle] \\ &= \mathbb{E}[\langle \tilde{\mathbf{g}}(\mathbb{E}[(k_t, a_t) | \mathcal{H}_t], f_t) | \tilde{z}_t \rangle] \\ &= \mathbb{E}[\langle \tilde{\mathbf{g}}(\tilde{x}_t, f_t) | \tilde{z}_t \rangle]. \end{aligned}$$

By definition of the algorithm,  $\tilde{x}_t = \tilde{\mathbf{x}}(\tilde{z}_t)$ . In other words (see Proposition 3.3), for all  $f \in \mathcal{F}$ , the scalar product  $\langle \tilde{\mathbf{g}}(\tilde{x}_t, f) | \tilde{z}_t \rangle$  is nonpositive. This is in particular true for  $f = f_t$ . Therefore,  $\mathbb{E}[\langle \tilde{g}_t | \tilde{z}_t \rangle] \leq 0$ .

We now turn to the second sum that involves the squared norms  $\|\tilde{g}_t\|_2^2$ . For  $1 \leq t \leq T$ , using the definition of  $\tilde{\mathbf{g}}$ ,

$$\begin{aligned} \|\tilde{g}_t\|_2^2 &= \left\| \tilde{\mathbf{g}}((k_t, a_t), \hat{f}_t) \right\|_2^2 \\ &= \left\| \left( \mathbb{1}_{\{k=k_t\}} \mathbb{1}_{\{a=a_t\}} \hat{f}_t \right)_{\substack{k \in \mathcal{K} \\ a \in \mathcal{A}}} \right\|_2^2 \\ &= \sum_{\substack{k \in \mathcal{K} \\ a \in \mathcal{A}}} \left\| \mathbb{1}_{\{k=k_t\}} \mathbb{1}_{\{a=a_t\}} \hat{f}_t \right\|_2^2 = \|\hat{f}_t\|_2^2. \end{aligned}$$

Using (ii) from Lemma B.1, we have

$$\mathbb{E}[\|\tilde{g}_t\|_2^2] = \mathbb{E}[\|\hat{f}_t\|_2^2] = \mathbb{E} \left[ \mathbb{E}[\|\hat{f}_t\|_2^2 | \mathcal{G}_t] \right] \leq \frac{|\mathcal{I}|^2}{\gamma}.$$

Putting everything together, we obtain in expectation the following bound on the distance from  $\tilde{g}_T$  to  $\tilde{\mathcal{C}}$ :

$$\mathbb{E}[\mathbf{d}_2(\tilde{g}_T, \tilde{\mathcal{C}})] = \mathbb{E} \left[ \max_{\tilde{z} \in \tilde{\mathcal{Z}}} \langle \tilde{g}_T | \tilde{z} \rangle \right] \leq \frac{1}{2\eta T} + \frac{\eta |\mathcal{I}|^2}{2\gamma},$$

where the above equality comes from the expression of the Euclidean distance to  $\tilde{\mathcal{C}}$  given by Proposition C.6.  $\square$

## B Proof of Theorem 4.1

### B.1 Average auxiliary payoff $\tilde{g}_T$ is close to auxiliary target set $\tilde{\mathcal{C}}$

**Lemma B.1**

$$\mathbb{E}[\mathbf{d}_2(\tilde{g}_T, \tilde{\mathcal{C}})] \leq \frac{1}{2\eta T} + \frac{\eta |\mathcal{I}|^2}{2\gamma}.$$

**Proof.** For  $t \geq 1$ , we can write

$$\begin{aligned} \tilde{z}_t &= \mathbf{P}_{\tilde{\mathcal{Z}}} \left( \eta \sum_{s=1}^{t-1} \tilde{g}_s \right) = \arg \min_{\tilde{z} \in \tilde{\mathcal{Z}}} \left\| \tilde{z} - \eta \sum_{s=1}^{t-1} \tilde{g}_s \right\|_2^2 \\ &= \arg \max_{\tilde{z} \in \tilde{\mathcal{Z}}} \left\{ \left\langle \eta \sum_{s=1}^{t-1} \tilde{g}_s \middle| \tilde{z} \right\rangle - \frac{1}{2} \|\tilde{z}\|_2^2 \right\}. \end{aligned}$$

Then, Theorem D.1 together with the fact that  $\|\tilde{\mathcal{Z}}\|_2 = \|\tilde{\mathcal{C}}^\circ \cap \mathcal{B}_2\|_2 \leq 1$  gives

$$\max_{\tilde{z} \in \tilde{\mathcal{Z}}} \sum_{t=1}^T \langle \tilde{g}_t | \tilde{z} \rangle - \sum_{t=1}^T \langle \tilde{g}_t | \tilde{z}_t \rangle \leq \frac{1}{2\eta} + \frac{\eta}{2} \sum_{t=1}^T \|\tilde{g}_t\|_2^2.$$

By taking the expectation and dividing by  $T$ , we get

$$\begin{aligned} \mathbb{E} \left[ \max_{\tilde{z} \in \tilde{\mathcal{Z}}} \langle \tilde{g}_T | \tilde{z} \rangle \right] &\leq \frac{1}{2\eta T} + \mathbb{E} \left[ \frac{1}{T} \sum_{t=1}^T \langle \tilde{g}_t | \tilde{z}_t \rangle \right] \\ &\quad + \frac{\eta}{2T} \mathbb{E} \left[ \sum_{t=1}^T \|\tilde{g}_t\|_2^2 \right]. \end{aligned}$$

We first analyze the first sum of the right-hand side. Let us prove that each scalar product  $\langle \tilde{g}_t | \tilde{z}_t \rangle$  is nonpositive in expectation. For all  $1 \leq t \leq T$ , we replace  $\tilde{g}_t$  by its definition:

$$\mathbb{E}[\langle \tilde{g}_t | \tilde{z}_t \rangle] = \mathbb{E} \left[ \langle \tilde{\mathbf{g}}((k_t, a_t), \hat{f}_t) | \tilde{z}_t \rangle \right].$$

We then consider the conditional expectation with respect to  $\mathcal{G}_t$ . The application  $\tilde{\mathbf{g}}((k_t, a_t), \cdot)$  being linear, and the variables  $k_t, a_t$  and  $\tilde{z}_t$  being measurable with

## B.2 From $\tilde{g}_T$ in the auxiliary space to $\mathbf{R}(\tilde{g}_T)$ in the initial space

### Lemma B.2

$$\mathbf{d}_2(\mathbf{R}(\tilde{g}_T), \mathbb{R}_-^d) \leq (L_{\mathbf{r}} \sqrt{|\mathcal{K}| |\mathcal{A}|}) \cdot \mathbf{d}_2(\tilde{g}_T, \tilde{\mathcal{C}}).$$

**Proof.** It follows from property (ii) in Proposition 3.3 that  $\tilde{\mathcal{C}} \subset \mathbf{R}^{-1}(\mathbb{R}_-^d)$ . Therefore, we can write

$$\begin{aligned} \mathbf{d}_2(\mathbf{R}(\tilde{g}_T), \mathbb{R}_-^d) &= \min_{g' \in \mathbb{R}_-^d} \|\mathbf{R}(\tilde{g}_T) - g'\|_2 \\ &\leq \min_{\tilde{g} \in \mathbf{R}^{-1}(\mathbb{R}_-^d)} \|\mathbf{R}(\tilde{g}_T) - \mathbf{R}(\tilde{g})\|_2 \\ &\leq \min_{\tilde{g} \in \tilde{\mathcal{C}}} \|\mathbf{R}(\tilde{g}_T) - \mathbf{R}(\tilde{g})\|_2 \\ &\leq \|\mathbf{R}\| \cdot \min_{\tilde{g} \in \tilde{\mathcal{C}}} \|\tilde{g}_T - \tilde{g}\|_2 \\ &= \|\mathbf{R}\| \cdot \mathbf{d}_2(\tilde{g}_T, \tilde{\mathcal{C}}), \end{aligned}$$

where  $\|\mathbf{R}\|$  is the operator norm of  $\mathbf{R}$ . To conclude the proof, let us prove that the latter is bounded from above by  $L_{\mathbf{r}} \sqrt{|\mathcal{K}| |\mathcal{A}|}$ . Let  $\tilde{g} \in (\mathbb{R}^{\mathcal{S} \times \mathcal{I}})^{\mathcal{K} \times \mathcal{A}}$ . By definition of  $\mathbf{R}$ , and using the Lipschitz constant  $L_{\mathbf{r}}$  from Lemma A.3 which is common to the linear applications  $\mathbf{r}^{[k]}(a, \cdot)$ , we have

$$\begin{aligned} \|\mathbf{R}(\tilde{g})\|_2 &= \left\| \sum_{\substack{k \in \mathcal{K} \\ a \in \mathcal{A}}} \mathbf{r}^{[k]}(a, \tilde{g}^{ka}) \right\|_2 \leq \sum_{\substack{k \in \mathcal{K} \\ a \in \mathcal{A}}} \left\| \mathbf{r}^{[k]}(a, \tilde{g}^{ka}) \right\|_2 \\ &\leq \sum_{\substack{k \in \mathcal{K} \\ a \in \mathcal{A}}} L_{\mathbf{r}} \|\tilde{g}^{ka}\|_2 \leq L_{\mathbf{r}} \sqrt{|\mathcal{K}| |\mathcal{A}| \sum_{\substack{k \in \mathcal{K} \\ a \in \mathcal{A}}} \|\tilde{g}^{ka}\|_2^2} \\ &= L_{\mathbf{r}} \sqrt{|\mathcal{K}| |\mathcal{A}|} \cdot \|\tilde{g}\|_2, \end{aligned}$$

which concludes the proof.  $\square$

## B.3 Decomposition of $\mathbf{R}(\tilde{g}_T)$

We have the following expression of the image by  $\mathbf{R}$  of the average auxiliary payoff  $\tilde{g}_T$ .

### Lemma B.3

$$\mathbf{R}(\tilde{g}_T) = \mathbf{R} \left( \frac{1}{T} \sum_{t=1}^T \tilde{g}_t \right) = \sum_{\substack{k \in \mathcal{K} \\ a \in \mathcal{A}}} \lambda_T(k, a) \cdot \mathbf{r}^{[k]}(a, \tilde{f}_T(k, a)).$$

**Proof.** Using the definitions of  $\mathbf{R}$ ,  $\tilde{g}_t$ ,  $\tilde{\mathbf{g}}$ , and the linearity of  $\mathbf{R}$  and  $\mathbf{r}^{[k]}(a, \cdot)$ , we can write

$$\begin{aligned} \mathbf{R} \left( \frac{1}{T} \sum_{t=1}^T \tilde{g}_t \right) &= \frac{1}{T} \sum_{t=1}^T \mathbf{R}(\tilde{g}_t) = \frac{1}{T} \sum_{t=1}^T \sum_{\substack{k \in \mathcal{K} \\ a \in \mathcal{A}}} \mathbf{r}^{[k]}(a, \tilde{g}_t^{ka}) \\ &= \frac{1}{T} \sum_{t=1}^T \sum_{\substack{k \in \mathcal{K} \\ a \in \mathcal{A}}} \mathbf{r}^{[k]} \left( a, \mathbb{1}_{\{k=k_t\}} \mathbb{1}_{\{a=a_t\}} \hat{f}_t \right) \\ &= \sum_{\substack{k \in \mathcal{K} \\ a \in \mathcal{A}}} \lambda_T(k, a) \cdot \mathbf{r}^{[k]}(a, \tilde{f}_T(k, a)). \end{aligned}$$

$\square$

## B.4 Average estimator $\tilde{f}_T(k, a)$ is close to average flag $f_T(k, a)$

### Lemma B.4

$$\begin{aligned} \mathbb{E} \left[ \sum_{\substack{k \in \mathcal{K} \\ a \in \mathcal{A}}} \lambda_T(k, a) \left\| \tilde{f}_T(k, a) - f_T(k, a) \right\|_2 \right] \\ \leq |\mathcal{I}| |\mathcal{K}| |\mathcal{A}| \left( \frac{8}{\sqrt{T} \gamma} + \frac{8}{3T \gamma} \right). \end{aligned}$$

**Proof.** Let  $k \in \mathcal{K}$  and  $a \in \mathcal{A}$ . Consider the random process  $(X_t(k, a))_{t \geq 1}$  defined by

$$X_t(k, a) := \mathbb{1}_{\{k_t=k, a_t=a\}} \left( \hat{f}_t - f_t \right),$$

and to which we are aiming at applying Corollary E.4.  $(X_t(k, a))_{t \geq 1}$  is a martingale difference sequence with respect to filtration  $(\mathcal{G}_t)_{t \geq 1}$ . Indeed, since  $\mathbb{1}_{\{k_t=k, a_t=a\}}$  is measurable with respect to  $\mathcal{G}_t$ ,

$$\begin{aligned} \mathbb{E} \left[ \mathbb{1}_{\{k_t=k, a_t=a\}} \left( \hat{f}_t - f_t \right) \middle| \mathcal{G}_t \right] \\ = \mathbb{1}_{\{k_t=k, a_t=a\}} \mathbb{E} \left[ \hat{f}_t - f_t \middle| \mathcal{G}_t \right] = 0. \end{aligned}$$

where the last equality follows from (i) in Lemma A.4. Moreover, using (iii) from Lemma A.4, we bound each  $X_t(k, a)$  as follows.

$$\begin{aligned} \|X_t(k, a)\|_2 &\leq \left\| \hat{f}_t - f_t \right\|_2 \leq \left\| \hat{f}_t \right\|_2 + \|f_t\|_2 \\ &\leq \frac{|\mathcal{I}|}{\gamma} + \left\| (\mathbf{s}(i, y_t))_{i \in \mathcal{I}} \right\|_2 \\ &= \frac{|\mathcal{I}|}{\gamma} + \sqrt{\sum_{i \in \mathcal{I}} \|\mathbf{s}(i, y_t)\|_2^2} \\ &\leq \frac{|\mathcal{I}|}{\gamma} + \sqrt{|\mathcal{I}|} \leq \frac{2|\mathcal{I}|}{\gamma}, \end{aligned}$$

where we used the fact that  $\gamma \geq 1$  for the last inequality. As far as the conditional variances are concerned, we have

$$\begin{aligned} \mathbb{E} \left[ \|X_t(k, a)\|_2^2 \middle| \mathcal{G}_t \right] &= \mathbb{E} \left[ \mathbb{1}_{\{k_t=k, a_t=a\}} \left\| \hat{f}_t - f_t \right\|_2^2 \middle| \mathcal{G}_t \right] \\ &\leq \mathbb{E} \left[ \left\| \hat{f}_t - f_t \right\|_2^2 \middle| \mathcal{G}_t \right] \\ &\leq \mathbb{E} \left[ \left\| \hat{f}_t \right\|_2^2 \middle| \mathcal{G}_t \right] + \mathbb{E} \left[ \|f_t\|_2^2 \middle| \mathcal{G}_t \right] \\ &\leq \frac{|\mathcal{I}|^2}{\gamma} + |\mathcal{I}| \leq \frac{2|\mathcal{I}|^2}{\gamma}. \end{aligned}$$

where the first term of the second line has been bounded using property (ii) from Lemma A.4, whereas the second term is bounded by  $|\mathcal{I}|$  since

$$\|f_t\|_2^2 = \|(\mathbf{s}(i, y_t))_{i \in \mathcal{I}}\|_2^2 = \sum_{i \in \mathcal{I}} \|\mathbf{s}(i, y_t)\|_2^2 \leq |\mathcal{I}|.$$

Therefore we have

$$\frac{1}{T} \sum_{t=1}^T \mathbb{E} \left[ \|X_t(k, a)\|_2^2 \middle| \mathcal{G}_t \right] \leq \frac{2|\mathcal{I}|^2}{\gamma}.$$

We can now apply Corollary E.4 with  $M = 2|\mathcal{I}|/\gamma$  and  $V = 2|\mathcal{I}|^2/\gamma$  to get:

$$\mathbb{E} \left[ \left\| \frac{1}{T} \sum_{t=1}^T X_t(k, a) \right\|_2 \right] \leq \frac{8|\mathcal{I}|}{\sqrt{T}\gamma} + \frac{8|\mathcal{I}|}{3T\gamma}.$$

Besides, it follows from the definition of  $X_t(k, a)$  that

$$\frac{1}{T} \sum_{t=1}^T X_t(k, a) = \lambda_T(k, a) \left( \bar{f}_T(k, a) - \bar{f}_T(k, a) \right).$$

Finally, by summing over  $k$  and  $a$ , we obtain:

$$\begin{aligned} \mathbb{E} \left[ \sum_{\substack{k \in \mathcal{K} \\ a \in \mathcal{A}}} \lambda_T(k, a) \left\| \left( \bar{f}_T(k, a) - \bar{f}_T(k, a) \right) \right\|_2 \right] \\ \leq |\mathcal{I}| |\mathcal{K}| |\mathcal{A}| \left( \frac{8}{\sqrt{T}\gamma} + \frac{8}{3T\gamma} \right). \end{aligned}$$

□

### B.5 Average estimator $\bar{f}_T(k, a)$ is close to $\mathcal{F}_c^k$

#### Lemma B.5

$$\mathbb{E} \left[ \sum_{\substack{k \in \mathcal{K} \\ a \in \mathcal{A}}} \mathbf{d}_2(\bar{g}_T^{ka}, \mathcal{F}_c^k) \right] \leq \sqrt{|\mathcal{K}| |\mathcal{A}|} \left( \frac{1}{2\eta T} + \frac{\eta |\mathcal{I}|^2}{2\gamma} \right)$$

**Proof.** Consider the set  $\tilde{\mathcal{Z}}_0$  defined by

$$\tilde{\mathcal{Z}}_0 := \prod_{k \in \mathcal{K}} ((\mathcal{F}_c^k)^\circ \cap \mathcal{B}_2)^{\mathcal{A}},$$

and let us assume for the moment that the following inclusion holds:

$$\tilde{\mathcal{Z}}_0 \subset \sqrt{|\mathcal{K}| |\mathcal{A}|} \cdot \tilde{\mathcal{Z}}. \quad (6)$$

For each  $k \in \mathcal{K}$  and  $a \in \mathcal{A}$ ,  $\mathcal{F}_c^k$  being a closed convex cone, Proposition C.6 gives the following expression of the distance of  $\bar{g}_T^{ka}$  to  $\mathcal{F}_c^k$ :

$$\mathbf{d}_2(\bar{g}_T^{ka}, \mathcal{F}_c^k) = \max_{\tilde{z}^{ka} \in (\mathcal{F}_c^k)^\circ \cap \mathcal{B}_2} \langle \bar{g}_T^{ka} | \tilde{z}^{ka} \rangle.$$

By summing over  $k$  and  $a$ , we have:

$$\begin{aligned} \sum_{\substack{k \in \mathcal{K} \\ a \in \mathcal{A}}} \mathbf{d}_2(\bar{g}_T^{ka}, \mathcal{F}_c^k) &= \sum_{\substack{k \in \mathcal{K} \\ a \in \mathcal{A}}} \max_{\tilde{z}^{ka} \in (\mathcal{F}_c^k)^\circ \cap \mathcal{B}_2} \langle \bar{g}_T^{ka} | \tilde{z}^{ka} \rangle \\ &= \max_{\tilde{z} \in \tilde{\mathcal{Z}}_0} \sum_{\substack{k \in \mathcal{K} \\ a \in \mathcal{A}}} \langle \bar{g}_T^{ka} | \tilde{z} \rangle \\ &\leq \sqrt{|\mathcal{K}| |\mathcal{A}|} \cdot \max_{\tilde{z} \in \tilde{\mathcal{Z}}} \langle \bar{g}_T | \tilde{z} \rangle \\ &= \sqrt{|\mathcal{K}| |\mathcal{A}|} \cdot \mathbf{d}_2(\bar{g}_T, \tilde{\mathcal{C}}), \end{aligned}$$

where for the inequality we used inclusion (6), and for the last equality Proposition C.6 together with the fact that  $\tilde{\mathcal{Z}} = \tilde{\mathcal{C}}^\circ \cap \mathcal{B}_2$  by definition. Taking the expectation and substituting distance  $\mathbf{d}_2(\bar{g}_T, \tilde{\mathcal{C}})$  by the bound from Lemma B.1 yields the result.

Let us now prove inclusion (6). Let  $\tilde{z} = (\tilde{z}^{ka})_{\substack{k \in \mathcal{K} \\ a \in \mathcal{A}}} \in \tilde{\mathcal{Z}}_0$ . First, let us prove that  $\tilde{z} \in \tilde{\mathcal{C}}^\circ$ . Let  $\tilde{g} \in \tilde{\mathcal{C}}$ . We can write

$$\langle \tilde{g} | \tilde{z} \rangle = \sum_{\substack{k \in \mathcal{K} \\ a \in \mathcal{A}}} \langle \tilde{z}^{ka} | \tilde{g}^{ka} \rangle.$$

But for each  $k \in \mathcal{K}$  and  $a \in \mathcal{A}$ , by definition of  $\tilde{\mathcal{Z}}_0$ , we have  $\tilde{z}^{ka} \in (\mathcal{F}_c^k)^\circ$ , and since  $\tilde{\mathcal{C}} \subset \prod_{k \in \mathcal{K}} (\mathcal{F}_c^k)^\mathcal{A}$  by definition, we also have  $\tilde{g}^{ka} \in \mathcal{F}_c^k$ . Therefore,  $\langle \tilde{g}^{ka} | \tilde{z}^{ka} \rangle \leq 0$  and consequently,  $\langle \tilde{g} | \tilde{z} \rangle \leq 0$ . This proves  $\tilde{\mathcal{Z}}_0 \subset \tilde{\mathcal{C}}^\circ$ .

Let  $\tilde{z} \in \tilde{\mathcal{Z}}_0$ . By definition of  $\tilde{\mathcal{Z}}_0$ , we have  $\|\tilde{z}^{ka}\|_2 \leq 1$  for all  $k \in \mathcal{K}$  and  $a \in \mathcal{A}$ . Thus

$$\|\tilde{z}\|_2 = \sqrt{\sum_{\substack{k \in \mathcal{K} \\ a \in \mathcal{A}}} \|\tilde{z}^{ka}\|_2^2} \leq \sqrt{|\mathcal{K}| |\mathcal{A}|},$$

and therefore  $\tilde{\mathcal{Z}}_0 \subset \sqrt{|\mathcal{K}| |\mathcal{A}|} \cdot \mathcal{B}_2$ . Finally, we have

$$\tilde{\mathcal{Z}}_0 \subset \tilde{\mathcal{C}}^\circ \cap \sqrt{|\mathcal{K}| |\mathcal{A}|} \cdot \mathcal{B}_2 = \sqrt{|\mathcal{K}| |\mathcal{A}|} \cdot \tilde{\mathcal{Z}}.$$

□

**B.6**  $\mathbf{r}^{[k]}(a, \bar{f}_T(k, a))$  is close to  $\mathbf{r}(a, \bar{f}_T(k, a))$

**Lemma B.6**

$$\begin{aligned} & \mathbb{E} \left[ \sum_{\substack{k \in \mathcal{K} \\ a \in \mathcal{A}}} \lambda_T(k, a) \left\| \mathbf{r}(a, \bar{f}_T(k, a)) - \mathbf{r}^{[k]}(a, \bar{f}_T(k, a)) \right\|_2 \right] \\ & \leq L_{\mathbf{r}} |\mathcal{I}| |\mathcal{K}| |\mathcal{A}| \left( \frac{8}{\sqrt{T}\gamma} + \frac{8}{3T\gamma} \right) \\ & \quad + L_{\mathbf{r}} \sqrt{|\mathcal{K}| |\mathcal{A}|} \left( \frac{1}{\eta T} + \frac{\eta |\mathcal{I}|^2}{\gamma} \right). \end{aligned}$$

**Proof.** Let  $(k, a) \in \mathcal{K} \times \mathcal{A}$  and denote  $f := \bar{f}_T(k, a)$  and  $\hat{f} := \bar{f}_T^k(k, a)$  to alleviate notation. Denote  $\mathbf{P}^{[k]}$  the Euclidean projection onto  $\mathcal{F}_c^k$ . Then of course  $\mathbf{P}^{[k]}(\hat{f})$  belongs to  $\mathcal{F}_c^k$ , and since  $\mathbf{r}(a, \cdot)$  and  $\mathbf{r}^{[k]}(a, \cdot)$  coincide on  $\mathcal{F}_c^k$  by Proposition A.2, we can write

$$\begin{aligned} \mathbf{r}(a, f) - \mathbf{r}^{[k]}(a, \hat{f}) &= \mathbf{r}(a, f) - \mathbf{r}(a, \hat{f}) + \mathbf{r}(a, \hat{f}) \\ & \quad - \mathbf{r}(a, \mathbf{P}^{[k]}(\hat{f})) + \mathbf{r}^{[k]}(a, \mathbf{P}^{[k]}(\hat{f})) - \mathbf{r}^{[k]}(a, \hat{f}). \end{aligned}$$

Thus, by taking the norm and using the triangle inequality and the Lipschitz constant  $L_{\mathbf{r}}$  which is common to  $\mathbf{r}(a, \cdot)$  and  $\mathbf{r}^{[k]}(a, \cdot)$  to get

$$\begin{aligned} & \left\| \mathbf{r}(a, f) - \mathbf{r}^{[k]}(a, \hat{f}) \right\|_2 \\ & \leq L_{\mathbf{r}} \left( \|f - \hat{f}\|_2 + 2 \cdot \mathbf{d}_2(\hat{f}, \mathcal{F}_c^k) \right). \end{aligned}$$

We now multiply by  $\lambda_T(k, a)$ . The last term in the above right-hand side is transformed as

$$\begin{aligned} 2\lambda_T(k, a) \cdot \mathbf{d}_2(\hat{f}, \mathcal{F}_c^k) &= 2 \cdot \mathbf{d}_2(\lambda_T(k, a)\hat{f}, \mathcal{F}_c^k) \\ &= 2 \cdot \mathbf{d}_2(\bar{g}_T^{ka}, \mathcal{F}_c^k), \end{aligned}$$

where used the fact that  $\mathcal{F}_c^k$  is a convex cone to push the factor  $\lambda_T(k, a)$  into the distance. Therefore,

$$\begin{aligned} & \lambda_T(k, a) \left\| \mathbf{r}(a, f) - \mathbf{r}^{[k]}(a, \hat{f}) \right\|_2 \\ & \leq L_{\mathbf{r}} \cdot \lambda_T(k, a) \left\| f - \hat{f} \right\|_2 + 2L_{\mathbf{r}} \cdot \mathbf{d}_2(\bar{g}_T^{ka}, \mathcal{F}_c^k). \end{aligned}$$

Finally, we get the result by taking the expectation, summing over  $k$  and  $a$ , and plugging Lemmas B.4 and B.5.  $\square$

**B.7**  $\mathbf{g}$  is closer to  $\mathbb{R}_-^d$  than  $\mathbf{r}$

**Lemma B.7**

$$\begin{aligned} & \mathbf{d}_2 \left( \sum_{\substack{k \in \mathcal{K} \\ a \in \mathcal{A}}} \lambda_T(k, a) \cdot \mathbf{g}(a, \bar{y}_T(k, a)), \mathbb{R}_-^d \right) \\ & \leq \mathbf{d}_2 \left( \sum_{\substack{k \in \mathcal{K} \\ a \in \mathcal{A}}} \lambda_T(k, a) \cdot \mathbf{r}(a, \bar{f}_T(k, a)), \mathbb{R}_-^d \right). \end{aligned}$$

**Proof.** Let  $k \in \mathcal{K}$  and  $a \in \mathcal{A}$ . First note that  $\mathbf{f}(\bar{y}_T(k, a)) = \bar{f}_T(k, a)$ . Indeed, using the affinity of  $\mathbf{f}$ ,

$$\begin{aligned} \mathbf{f}(\bar{y}_T(k, a)) &= \mathbf{f} \left( \frac{1}{|N_T(k, a)|} \sum_{t \in N_T(k, a)} y_t \right) \\ &= \frac{1}{|N_T(k, a)|} \sum_{t \in N_T(k, a)} \mathbf{f}(y_t) \\ &= \frac{1}{|N_T(k, a)|} \sum_{t \in N_T(k, a)} f_t = \bar{f}_T(k, a). \end{aligned}$$

For each component  $n \in \{1, \dots, d\}$ , we have  $\mathbf{g}^n(a, \bar{y}_T(k, a)) \leq \mathbf{r}^n(a, \bar{f}_T(k, a))$  by property (i) in Proposition 3.1. Finally, using the explicit expression of the Euclidean distance to  $\mathbb{R}_-^d$ , we have

$$\begin{aligned} & \mathbf{d}_2 \left( \sum_{\substack{k \in \mathcal{K} \\ a \in \mathcal{A}}} \lambda_T(k, a) \cdot \mathbf{g}(a, \bar{y}_T(k, a)), \mathbb{R}_-^d \right) \\ &= \sqrt{\sum_{n=1}^d \left( \sum_{\substack{k \in \mathcal{K} \\ a \in \mathcal{A}}} \lambda_T(k, a) \cdot \mathbf{g}^n(a, \bar{y}_T(k, a)) \right)^2} \\ & \leq \sqrt{\sum_{n=1}^d \left( \sum_{\substack{k \in \mathcal{K} \\ a \in \mathcal{A}}} \lambda_T(k, a) \cdot \mathbf{r}^n(a, \bar{f}_T(k, a)) \right)^2} \\ &= \mathbf{d}_2 \left( \sum_{\substack{k \in \mathcal{K} \\ a \in \mathcal{A}}} \lambda_T(k, a) \cdot \mathbf{r}(a, \bar{f}_T(k, a)), \mathbb{R}_-^d \right). \end{aligned}$$

$\square$

**B.8** Decomposition of  $\mathbf{g}(a_t, y_t)$  with respect to the realized auxiliary decision  $(k_t, a_t)$

**Lemma B.8**

$$\frac{1}{T} \sum_{t=1}^T \mathbf{g}(a_t, y_t) = \sum_{\substack{k \in \mathcal{K} \\ a \in \mathcal{A}}} \lambda_T(k, a) \cdot \mathbf{g}(a, \bar{y}_T(k, a))$$



**Proof.** Using the definitions of  $N_T(k, a)$  and  $\lambda_T(k, a)$ , and the linearity of  $\mathbf{g}(a, \cdot)$ , we have

$$\begin{aligned} \frac{1}{T} \sum_{t=1}^T \mathbf{g}(a_t, y_t) &= \frac{1}{T} \sum_{\substack{k \in \mathcal{K} \\ a \in \mathcal{A}}} \sum_{t \in N_T(k, a)} \mathbf{g}(a, y_t) \\ &= \sum_{\substack{k \in \mathcal{K} \\ a \in \mathcal{A}}} \frac{|N_T(k, a)|}{T} \cdot \frac{1}{|N_T(k, a)|} \sum_{t \in N_T(k, a)} \mathbf{g}(a, y_t) \\ &= \sum_{\substack{k \in \mathcal{K} \\ a \in \mathcal{A}}} \lambda_T(k, a) \cdot \mathbf{g}(a, \bar{y}_T(k, a)). \end{aligned}$$

□

### B.9 From $\mathbf{g}(i_t, j_t)$ to $\mathbf{g}(a_t, y_t)$

#### Lemma B.9

$$\begin{aligned} \mathbb{E} \left[ \left\| \frac{1}{T} \sum_{t=1}^T \mathbf{g}(i_t, j_t) - \frac{1}{T} \sum_{t=1}^T \mathbf{g}(a_t, y_t) \right\|_2 \right] \\ \leq \frac{2\sqrt{\pi} \|\mathbf{g}\|_2}{\sqrt{T}} + 2\gamma \|\mathbf{g}\|_2. \end{aligned}$$

**Proof.** Consider the process  $(X_t)_{t \geq 1}$  defined by

$$X_t = \mathbf{g}(i_t, j_t) - (1 - \gamma)\mathbf{g}(a_t, y_t) - \gamma\mathbf{g}(u, y_t),$$

and the filtration  $(\mathcal{G}'_t)_{t \geq 1}$  where  $\mathcal{G}'_t$  is generated by

$$(k_1, a_1, y_1, i_1, s_1, \dots, k_{t-1}, a_{t-1}, y_{t-1}, i_{t-1}, s_{t-1}, k_t, a_t, y_t).$$

$(X_t)_{t \geq 1}$  is martingale difference sequence with respect to filtration  $(\mathcal{G}'_t)_{t \geq 1}$ . Indeed, knowing  $\mathcal{G}'_t$ , the law of  $i_t$  is  $(1 - \gamma)a_t + \gamma u$  by definition of the algorithm, and thus the law of  $(i_t, j_t)$  is  $((1 - \gamma)a_t + \gamma u) \otimes y_t$ . We can then write, by bilinearity of  $\mathbf{g}$ :

$$\mathbb{E}[\mathbf{g}(i_t, j_t) | \mathcal{G}'_t] = (1 - \gamma)\mathbf{g}(a_t, y_t) + \gamma\mathbf{g}(u, y_t).$$

Moreover,  $\|X_t\|_2$  is always bounded by  $2\|\mathbf{g}\|_2$ :

$$\begin{aligned} \|X_t\|_2 &= \|(1 - \gamma)(\mathbf{g}(i_t, j_t) - \mathbf{g}(a_t, y_t)) \\ &\quad + \gamma(\mathbf{g}(i_t, j_t) - \mathbf{g}(u, y_t))\|_2 \\ &\leq (1 - \gamma)\|\mathbf{g}(i_t, j_t) - \mathbf{g}(a_t, y_t)\|_2 \\ &\quad + \gamma\|\mathbf{g}(i_t, j_t) - \mathbf{g}(u, y_t)\|_2 \\ &\leq 2\|\mathbf{g}\|_2. \end{aligned}$$

We can thus apply Corollary E.2 with  $M = 2\|\mathbf{g}\|_2$  to get

$$\mathbb{E} \left[ \left\| \frac{1}{T} \sum_{t=1}^T X_t \right\|_2 \right] \leq \frac{2\sqrt{\pi} \|\mathbf{g}\|_2}{\sqrt{T}}.$$

Therefore,

$$\begin{aligned} &\left\| \frac{1}{T} \sum_{t=1}^T \mathbf{g}(i_t, j_t) - \frac{1}{T} \sum_{t=1}^T \mathbf{g}(a_t, y_t) \right\|_2 \\ &= \left\| \frac{1}{T} \sum_{t=1}^T (X_t + \gamma(\mathbf{g}(u, y_t) - \mathbf{g}(a_t, y_t))) \right\|_2 \\ &\leq \left\| \frac{1}{T} \sum_{t=1}^T X_t \right\|_2 + \left\| \frac{\gamma}{T} \sum_{t=1}^T (\mathbf{g}(u, y_t) - \mathbf{g}(a_t, y_t)) \right\|_2 \\ &\leq \left\| \frac{1}{T} \sum_{t=1}^T X_t \right\|_2 + 2\gamma \|\mathbf{g}\|_2, \end{aligned}$$

And taking the expectation:

$$\begin{aligned} \mathbb{E} \left[ \left\| \frac{1}{T} \sum_{t=1}^T \mathbf{g}(i_t, j_t) - \frac{1}{T} \sum_{t=1}^T \mathbf{g}(a_t, y_t) \right\|_2 \right] \\ \leq \frac{2\sqrt{\pi} \|\mathbf{g}\|_2}{\sqrt{T}} + 2\gamma \|\mathbf{g}\|_2. \end{aligned}$$

□

### B.10 Final bound

We now combine the above lemmas in the order specified at the beginning of the section to get:

$$\begin{aligned} \mathbb{E}[\mathbf{d}_2(\bar{g}_T, \mathbb{R}^d)] &\leq \frac{2\sqrt{\pi} \|\mathbf{g}\|_2}{\sqrt{T}} + 2\gamma \|\mathbf{g}\|_2 \\ &\quad + L_{\mathbf{r}} |\mathcal{I}| |\mathcal{K}| |\mathcal{A}| \left( \frac{8}{\sqrt{T}\gamma} + \frac{8}{3T\gamma} \right) \\ &\quad + \frac{3L_{\mathbf{r}}}{2} \sqrt{|\mathcal{K}| |\mathcal{A}|} \left( \frac{1}{\eta T} + \frac{\eta |\mathcal{I}|^2}{\gamma} \right). \end{aligned}$$

Injecting the values of  $\eta$  and  $\gamma$  yields the result.

## C Closed Convex Cones

Throughout the section,  $\mathcal{W}$  will be a finite-dimensional vector space and  $\mathcal{W}^*$  its dual.

**Definition C.1** *A nonempty subset  $\mathcal{C}$  of  $\mathcal{W}$  is a closed convex cone if it is closed and if for all  $w, w' \in \mathcal{C}$  and  $\lambda \in \mathbb{R}_+$ , we have  $w + w' \in \mathcal{C}$  and  $\lambda w \in \mathcal{C}$ .*

The following proposition gathers a few immediate properties.

**Proposition C.2** (i) *A closed convex cone is convex.*

(ii) *An intersection of closed convex cones is a closed convex cone.*

(iii) A Cartesian product of closed convex cones is a closed convex cone.

(iv) A half-space of the form  $\{w \in \mathcal{W} \mid \langle z|w \rangle \leq 0\}$  (for some  $z \in \mathcal{W}^*$ ) is a closed convex cone.

**Definition C.3** Let  $\mathcal{A}$  be a subset of  $\mathcal{W}$ . The polar cone of  $\mathcal{A}$  is a subset of the dual space  $\mathcal{W}^*$  defined by

$$\mathcal{A}^\circ = \{z \in \mathcal{W}^* \mid \forall w \in \mathcal{A}, \langle w|z \rangle \leq 0\}.$$

The following proposition is an immediate consequence of the Bipolar theorem — see e.g. Theorem 3.3.14 in Borwein and Lewis [2010].

**Proposition C.4** Let  $\mathcal{A}$  be a subset of  $\mathcal{W}$ .

(i)  $\mathcal{A}^{\circ\circ}$  is the smallest closed convex cone containing  $\mathcal{A}$ .

(ii) If  $\mathcal{A}$  is closed and convex, then  $\mathcal{A}^{\circ\circ} = \mathbb{R}_+\mathcal{A}$ .

(iii) If  $\mathcal{A}$  is a closed convex cone, then  $\mathcal{A}^{\circ\circ} = \mathcal{A}$ .

**Proposition C.5** Let  $\varphi : \mathcal{W} \rightarrow \tilde{\mathcal{W}}$  be a linear application between two finite-dimensional vector spaces  $\mathcal{W}$  and  $\tilde{\mathcal{W}}$ ,  $\varphi^*$  its transpose,  $\mathcal{C}$  and  $\tilde{\mathcal{C}}$  closed convex cones in  $\mathcal{W}$  and  $\tilde{\mathcal{W}}$  respectively.

(i)  $\varphi(\mathcal{C})$  is a closed convex cone.

(ii) Then  $\varphi^{-1}(\tilde{\mathcal{C}}) = \varphi^*(\tilde{\mathcal{C}}^\circ)^\circ$ . In particular,  $\varphi^{-1}(\tilde{\mathcal{C}})$  is a closed convex cone.

**Proof.** Property (i) is obvious. We prove property (ii) as follows. For  $w \in \mathcal{W}$ ,

$$\begin{aligned} w \in \varphi^{-1}(\tilde{\mathcal{C}}) &\iff \varphi(w) \in \tilde{\mathcal{C}} \iff \varphi(w) \in \tilde{\mathcal{C}}^{\circ\circ} \\ &\iff \forall \tilde{z} \in \tilde{\mathcal{C}}^\circ, \langle \tilde{z}|\varphi(w) \rangle \leq 0 \\ &\iff \forall z \in \tilde{\mathcal{C}}^\circ, \langle \varphi^*(\tilde{z})|w \rangle \leq 0 \\ &\iff w \in \varphi^*(\tilde{\mathcal{C}}^\circ)^\circ. \end{aligned}$$

Therefore,  $\varphi^{-1}(\tilde{\mathcal{C}})$  is a closed convex cone because it is a polar cone.  $\square$

**Proposition C.6** Let  $\mathcal{C}$  be a closed convex cone in  $\mathbb{R}^n$ . For all point  $w \in \mathbb{R}^n$ , its Euclidean distance to  $\mathcal{C}$  can be written

$$\mathbf{d}_2(w, \mathcal{C}) = \max_{z \in \mathcal{C}^\circ \cap \mathcal{B}_2} \langle w|z \rangle.$$

where  $\mathcal{B}_2$  denotes the closed unit Euclidean ball.

## D A regret minimization bound

The following statement is classic in the regret minimization literature—see e.g. Shalev-Shwartz [2011, Theorem 2.4].

**Theorem D.1** Let  $n \geq 1$ ,  $\mathbb{R}^n$  endowed with its canonical Euclidean structure,  $\mathcal{Z}$  a nonempty convex compact subset of  $\mathbb{R}^d$ ,  $(u_t)_{t \geq 1}$  a sequence in  $\mathbb{R}^n$ ,  $\eta > 0$ , and

$$z_t = \arg \max_{z \in \mathcal{Z}} \left\{ \left\langle \eta \sum_{s=1}^{t-1} u_s \middle| z \right\rangle - \frac{1}{2} \|z\|_2^2 \right\}, \quad t \geq 1.$$

Then, for all  $T \geq 1$ ,

$$\max_{z \in \mathcal{Z}} \sum_{t=1}^T \langle u_t|z \rangle - \sum_{t=1}^T \langle u_t|z_t \rangle \leq \frac{\|\mathcal{Z}\|_2^2}{2\eta} + \frac{\eta}{2} \sum_{t=1}^T \|u_t\|_2^2.$$

## E Concentration inequalities

The following result is a generalization to vector-valued martingale differences of Hoeffding–Azuma’s inequality and is due to Kallenberg and Sztencel [1991].

**Proposition E.1** Let  $(U_t)_{t \geq 1}$  be a sequence of martingale differences in  $\mathbb{R}^d$ , bounded almost-surely by  $M > 0$ :

$$\forall t \geq 1, \quad \|U_t\|_2 \leq M, \quad \text{a.s.}$$

Then, for every  $\varepsilon > 0$  and  $T \geq 1$ ,

$$\mathbb{P} \left[ \left\| \frac{1}{T} \sum_{t=1}^T U_t \right\|_2 \geq \varepsilon \right] \leq 2 \exp \left( -\frac{T\varepsilon^2}{4M^2} \right).$$

**Corollary E.2** Under the assumptions of Proposition E.1, we have:

$$\mathbb{E} \left[ \left\| \frac{1}{T} \sum_{t=1}^T U_t \right\|_2 \right] \leq M \sqrt{\frac{\pi}{T}}.$$

**Proof.** The result follows from Proposition E.1 by integrating the tail of the distribution:

$$\begin{aligned} \mathbb{E} [\| \bar{U}_T \|_2] &= \int_0^{+\infty} \mathbb{P} [\| \bar{U}_T \|_2 \geq \varepsilon] \, \mathrm{d}\varepsilon \\ &\leq \int_0^{+\infty} 2e^{-T\varepsilon^2/4M^2} \, \mathrm{d}\varepsilon \\ &= 2 \int_0^{+\infty} e^{-\varepsilon^2(T/4M^2)} \, \mathrm{d}\varepsilon = M \sqrt{\frac{\pi}{T}}. \end{aligned}$$

$\square$

The following Bernstein-like inequality is proved in Pinelis [1994]—see also [Tarres and Yao, 2014, Corollary A.2].

**Proposition E.3** *Let  $(X_t)_{t \geq 1}$  be a martingale difference sequence in a Hilbert space with respect to a filtration  $(\mathcal{G}_t)_{t \geq 0}$ . Suppose that  $\|X_t\| \leq M$  almost-surely, and*

$$\frac{1}{T} \sum_{t=1}^T \mathbb{E} \left[ \|X_t\|^2 \mid \mathcal{G}_{t-1} \right] \leq V.$$

Then,

$$\mathbb{P} \left[ \max_{1 \leq t \leq T} \left\| \sum_{t'=1}^t X_{t'} \right\| \geq \varepsilon \right] \leq 2 \exp \left( -\frac{\varepsilon^2}{2TV + 2M\varepsilon/3} \right).$$

**Corollary E.4** *Under the assumptions of Proposition E.3,*

$$\mathbb{E} \left[ \left\| \frac{1}{T} \sum_{t=1}^T X_t \right\| \right] \leq 4\sqrt{2} \sqrt{\frac{V}{T}} + \frac{4M}{3T}.$$

**Proof.** Let  $A \geq 0$  to be chosen later.

$$\begin{aligned} \mathbb{E} [\|\bar{X}_T\|] &= \int_0^{+\infty} \mathbb{P} [\|\bar{X}_T\| \geq \varepsilon] \, d\varepsilon \\ &\leq 2 \int_0^{+\infty} \exp \left( -\frac{\varepsilon^2 T^2}{2VT + 2M\varepsilon T/3} \right) \, d\varepsilon \\ &= 2 \int_0^{+\infty} \exp \left( -\frac{\varepsilon^2 T}{2V + 2M\varepsilon/3} \right) \, d\varepsilon \\ &\leq 2 \left( A + \int_A^{+\infty} \exp \left( -\frac{\varepsilon^2 T}{2\varepsilon(V/A + M/3)} \right) \, d\varepsilon \right) \\ &= 2 \left( A + \int_A^{+\infty} \exp \left( -\frac{\varepsilon T}{2(V/A + M/3)} \right) \, d\varepsilon \right) \\ &= 2 \left( A + \left[ -\frac{2}{T} \left( \frac{V}{A} + \frac{M}{3} \right) \right. \right. \\ &\quad \left. \left. \times \exp \left( -\frac{\varepsilon T}{2(V/A + M/3)} \right) \right]_A^{+\infty} \right) \\ &\leq 2A + \frac{4}{T} \left( \frac{V}{A} + \frac{M}{3} \right). \end{aligned}$$

Choosing  $A = \sqrt{2V/T}$  gives:

$$\mathbb{E} [\|\bar{X}_T\|] \leq 4\sqrt{2} \sqrt{\frac{V}{T}} + \frac{4M}{3T}.$$

□
